# Supplementary material for: Effect of Cardiotonic Steroid Marinobufagenin on Vascular Remodeling and Cognitive Impairment in Young Dahl-S Rats
Source: MDPI journal article supplement (doi:10.3390/ijms23094563), 2022-04-20
Supplement: s1 [file s1]

# Supplementary Materials

**Table S1.** Primers used for quantitative real-time polymerase chain reaction analysis.

| Gene symbol and name                                                 | QuantiTect Primer Assay name (Qiagen) |
|----------------------------------------------------------------------|---------------------------------------|
| <i>APOE</i> rat (apolipoprotein E)                                   | Rn_Apoe_1_SG                          |
| <i>APP</i> rat (amyloid precursor protein)                           | Rn_App_1_SG                           |
| <i>COL1a1</i> rat (collagen 1 alpha 1)                               | Rn_Col1a1_2_SG                        |
| <i>COL1a2</i> rat (collagen 1 alpha 2)                               | Rn_Col1a2_2_SG                        |
| <i>COL3a1</i> rat (collagen 3 alpha 1)                               | Rn_Col3a1_1_SG                        |
| <i>COL4a1</i> rat (collagen 4 alpha 1)                               | Rn_Col4a1_1_SG                        |
| <i>COL5a1</i> rat (collagen 5 alpha 1)                               | Rn_Col5a1_1_SG                        |
| <i>CTGF</i> rat (connective tissue growth factor 1)                  | Rn_Ctgf_1_SG                          |
| <i>FLI1</i> rat (Friend leukemia integration 1 transcription factor) | Rn_Fli1_1_SG                          |
| <i>FN1</i> rat (fibronectin 1)                                       | Rn_Fn1_1_SG                           |
| <i>GAPDH</i> rat (glyceraldehydes-3-phosphate dehydrogenase)         | Rn_Gapdh_1_SG                         |
| <i>PSEN1</i> rat (presenilin 1)                                      | Rn_PSEN1_1_SG                         |
| <i>PSEN2</i> rat (presenilin 2)                                      | Rn_RGD:621060_1_SG                    |
| <i>TGFb1</i> rat (transforming growth factor beta 1)                 | Rn_Tgfb1_1_SG                         |

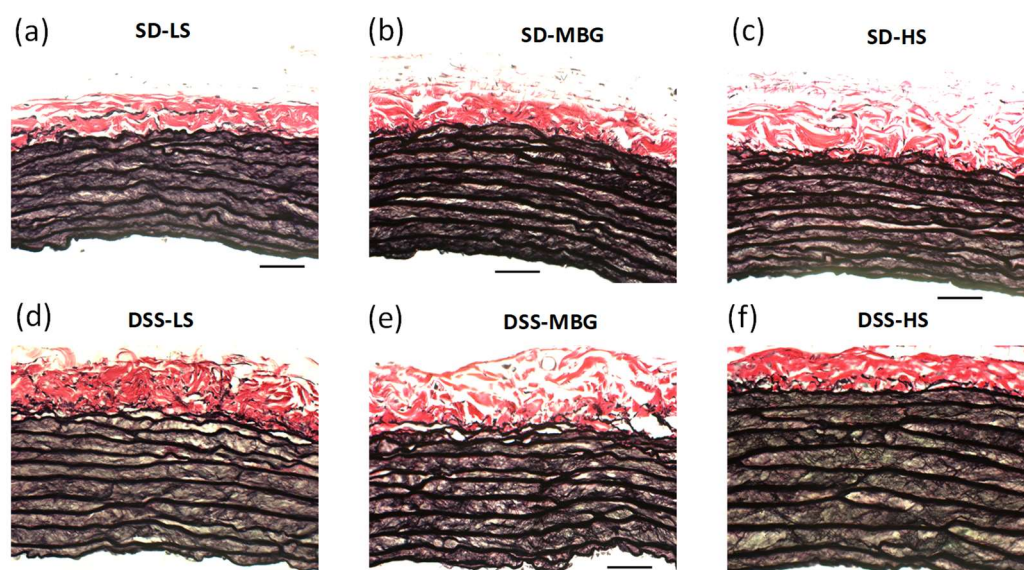

**Figure S1.** Collagen and elastin in rat aortae. (a–f) The representative photomicrographs of aortae stained by Verhoeff's stain (collagen is stained red, elastin is stained black) from each experimental group: (a) SD-LS; (b) SD-MBG; (c) SD-HS; (d) DSS-LS; (e) DSS-MBG; (f) DSS-HS. The difference in elastin abundance was non-significant between all groups. SD, Sprague-Dawley rats; DSS, Dahl salt sensitive rats; LS, low salt diet; MBG, marinobufagenin; HS, high salt diet. Scale bar is 50  $\mu$ m.

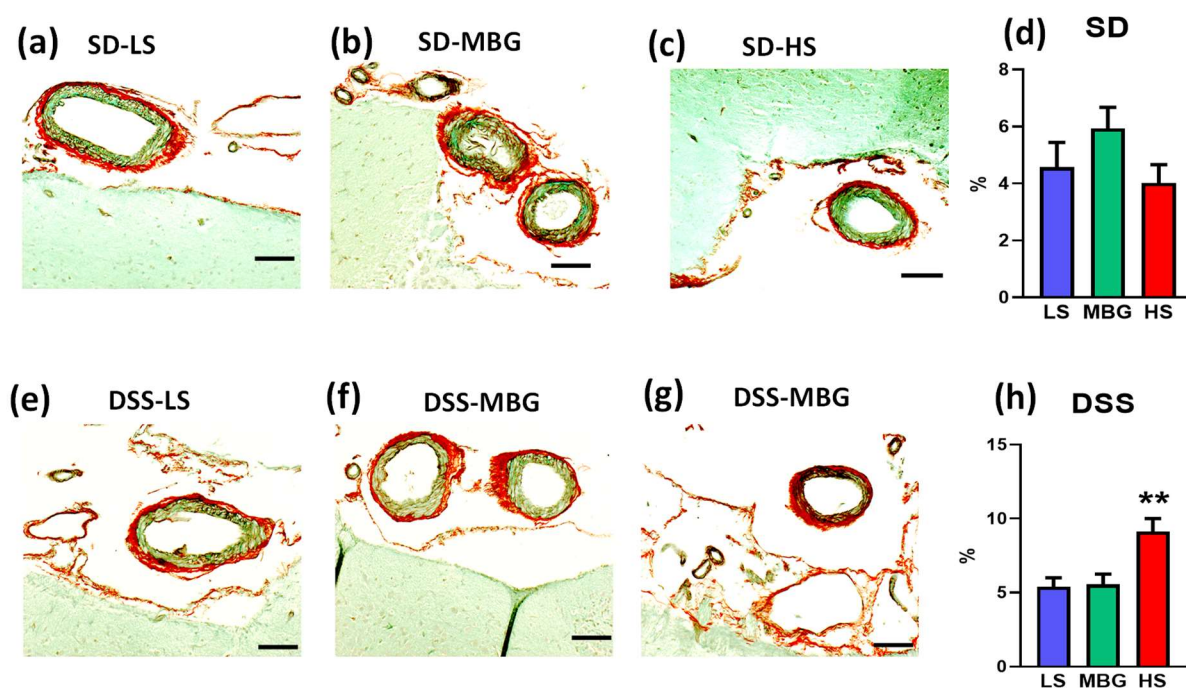

**Figure S2. Collagen in arterial media in cerebral arteries.** Representative photomicrographs of cerebral arteries from SD (a-c) and DSS (e-g) rats stained with Picro-Sirius Red Fast Green; collagen abundance in the arterial media in SD (d) and DSS (h). Collagen in the aortic wall is stained red; muscle and intracellular fibers are stained green ( $n = 6$  rats/group; 2–7 images of arteries per rat). SD-LS (a), SD-MBG (b), SD-HS (c), DSS-LS (e), DSS-MBG (f), DSS-HS (g), SD (d), DSS (h). By 2-way ANOVA: \*\* $p < 0.01$  vs. LS. SD, Sprague-Dawley rats; DSS, Dahl salt-sensitive rats; LS, low-salt diet; MBG, marinobufagenin; HS, high-salt diet. Scale bar is 100  $\mu\text{m}$ .
